# Unbiased and Mobile Gait Analysis Detects Motor Impairment in Parkinson's Disease

Jochen Klucken<sup>1</sup>, Jens Barth<sup>1,2,3</sup>, Patrick Kugler<sup>2</sup>, Johannes Schlachetzki<sup>1</sup>, Thore Henze<sup>1</sup>, Franz Marxreiter<sup>1</sup>, Zacharias Kohl<sup>1</sup>, Ralph Steidl<sup>3</sup>, Joachim Hornegger<sup>2</sup>, Bjoern Eskofier<sup>2</sup>, Juergen Winkler<sup>1\*</sup>

**1** Department of Molecular Neurology, University Hospital Erlangen, Erlangen, Germany, **2** Pattern Recognition Lab, Department of Computer Science, Friedrich-Alexander-University of Erlangen-Nuremberg, Erlangen, Germany, **3** ASTRUM IT GmbH, Erlangen, Germany

## Abstract

Motor impairments are the prerequisite for the diagnosis in Parkinson's disease (PD). The cardinal symptoms (bradykinesia, rigor, tremor, and postural instability) are used for disease staging and assessment of progression. They serve as primary outcome measures for clinical studies aiming at symptomatic and disease modifying interventions. One major caveat of clinical scores such as the Unified Parkinson Disease Rating Scale (UPDRS) or Hoehn&Yahr (H&Y) staging is its rater and time-of-assessment dependency. Thus, we aimed to objectively and automatically classify specific stages and motor signs in PD using a mobile, biosensor based Embedded Gait Analysis using Intelligent Technology (eGalT). eGalT consist of accelerometers and gyroscopes attached to shoes that record motion signals during standardized gait and leg function. From sensor signals 694 features were calculated and pattern recognition algorithms were applied to classify PD, H&Y stages, and motor signs correlating to the UPDRS-III motor score in a training cohort of 50 PD patients and 42 age matched controls. Classification results were confirmed in a second independent validation cohort (42 patients, 39 controls). eGalT was able to successfully distinguish PD patients from controls with an overall classification rate of 81%. Classification accuracy increased with higher levels of motor impairment (91% for more severely affected patients) or more advanced stages of PD (91% for H&Y III patients compared to controls), supporting the PD-specific type of analysis by eGalT. In addition, eGalT was able to classify different H&Y stages, or different levels of motor impairment (UPDRS-III). In conclusion, eGalT as an unbiased, mobile, and automated assessment tool is able to identify PD patients and characterize their motor impairment. It may serve as a complementary mean for the daily clinical workup and support therapeutic decisions throughout the course of the disease.

**Citation:** Klucken J, Barth J, Kugler P, Schlachetzki J, Henze T, et al. (2013) Unbiased and Mobile Gait Analysis Detects Motor Impairment in Parkinson's Disease. PLoS ONE 8(2): e56956. doi:10.1371/journal.pone.0056956

**Editor:** Mathias Toft, Oslo University Hospital, Norway

**Received:** October 12, 2012; **Accepted:** January 16, 2013; **Published:** February 19, 2013

**Copyright:** © 2013 Klucken et al. This is an open-access article distributed under the terms of the Creative Commons Attribution License, which permits unrestricted use, distribution, and reproduction in any medium, provided the original author and source are credited.

**Funding:** This work was funded by the Bavarian Research Foundation (AZ 974-11), ELAN ("Erlanger Leistungsbezogene Anschubfinanzierung und Nachwuchsförderung", University Hospital Erlangen, Germany - AZ: 1008.17.1), and by a project grant of ASTRUM IT GmbH. Shoes were provided by adidas® AG. The funders had no role in study design, data collection and analysis, decision to publish, or preparation of the manuscript.

**Competing Interests:** This study was partly funded by a project grant of ASTRUM IT GmbH. Shoes were provided by adidas® AG. J. Barth and R. Steidl are employed by ASTRUM IT GmbH. eGalT as developed and described in the present manuscript serves scientific interest in its present form. The automated gait analysis system as described is not a commercial product. Here, the authors present a "proof-of-principle" for the ability of sensor based gait analysis to be used as patients diagnostic and therapy monitoring tool. There are no patents, products in development or marketed products to declare. This does not alter the authors' adherence to all the PLOS ONE policies on sharing data and materials.

\* E-mail: jochen.klucken@uk-erlangen.de

## Introduction

Motor symptoms such as bradykinesia, rigidity, tremor, and postural instability define the diagnosis of Parkinson's disease (PD) [1]. The presence of rigidity and/or tremor defines distinct clinical phenotypes of PD [2]. Motor impairment leads to specific gait characteristic in PD, such as shuffling gait, reduced step length, impaired gait initiation, and reduced gait speed. Gait impairment and consecutively reduced mobility with loss of independency lead to the severe reduction of quality of life in PD patients [3]. The MDS Unified Parkinson Disease Rating Scale (UPDRS) - Part III is the most commonly used scale to rate motor symptoms in PD [4], and is widely accepted test to determine the efficacy of intervention in clinical studies. Disease progression is categorized using the Hoehn&Yahr (H&Y) staging [5], substantially relying on the presence and characteristics of motor signs related to

independence and quality of life. With disease progression, gait impairment increases and motor symptoms start to fluctuate, mainly recorded subjectively in patient diaries. Thus, subjective information and rating of motor signs are the basis for the daily clinician's diagnostic workup and guide therapeutic decisions.

Body-worn inertial measurement units comprising of biosensors such as accelerometers and gyroscopes are able to objectively measure changes of gait patterns. However, recent studies mostly focused on a limited number of preselected features of sensor derived signals without the use of pattern recognition approaches, or characterized individual gait abnormalities in a limited number of PD patients [6–11]. Our goal was to establish and validate a biosensor-based mobile and objective gait analysis system that uses pattern recognition algorithms to classify motor signs of gait impairment in PD. Pattern recognition approaches analyze several hundreds of computed biosensor derived gait signals. They are

**Table 1.** Characteristics of the study population.

| Population:<br>Variable              | TRAINING             |                   | VALIDATION           |                   |
|--------------------------------------|----------------------|-------------------|----------------------|-------------------|
|                                      | PD patients (n = 50) | controls (n = 42) | PD patients (n = 42) | controls (n = 39) |
| Age (y, mean, $\pm$ SD)              | 63.9 $\pm$ 10.6      | 60.0 $\pm$ 11.2   | 65.1 $\pm$ 9.7       | 60.7 $\pm$ 11.8   |
| Sex (male:female)                    | 36:14                | 17:25             | 28:14                | 16:23             |
| Age at onset (y, mean, $\pm$ SD)     | 57.6 $\pm$ 10.0      | /                 | 59.7 $\pm$ 11.3      | /                 |
| Disease duration (y, mean, $\pm$ SD) | 6.5 $\pm$ 4.7        | /                 | 5.6 $\pm$ 4.7        | /                 |
| H&Y ( $\pm$ SD)                      | 2.1 $\pm$ 0.9        | /                 | 2.2 $\pm$ 0.9        | /                 |
| UPDRS-III motor score ( $\pm$ SD)    | 18.3 $\pm$ 11.4      | 0                 | 20.7 $\pm$ 11.8      | 0                 |
| Levodopa equivalent (mg/d, $\pm$ SD) | 492 $\pm$ 411        | 0                 | 418 $\pm$ 397        | 0                 |
| Depression score (SDS, $\pm$ SD)     | 49.5 $\pm$ 13.6*     | 37.9 $\pm$ 8.4    | 50.9 $\pm$ 11.0*     | 40.2 $\pm$ 8.0    |
| Weight (kg, $\pm$ SD)                | 77.2 $\pm$ 13.9      | 75.3 $\pm$ 13.1   | 77.1 $\pm$ 16.3      | 74.6 $\pm$ 13.7   |
| Height (cm, $\pm$ SD)                | 172 $\pm$ 9.6        | 170 $\pm$ 7.2     | 171 $\pm$ 8.8        | 169 $\pm$ 8.7     |

\*:  $p < 0.001$  Student's T-test.

doi:10.1371/journal.pone.0056956.t001

able to deliver high discriminatory power for group differentiation [12,13]. For example, in a recent prospective study, we analyzed 2244 biomechanical movement features of 153 subjects, of which 6 developed gait impairment associated with severe patellafemoral pain syndrome. Automatic pattern recognition revealed one single feature (hip flexion-extension moment) that perfectly separated the symptomatic from the asymptomatic group [14].

In the present case-control study using a training and a validation population we combined sensor derived signals with pattern recognition approaches to test two hypotheses: Is this embedded gait analysis system using intelligent technology (eGaIT) able to assess PD-related gait changes allowing to A) separate patients from controls in order to support the clinical diagnosis of PD; and B) correctly categorize patients in different stages or with different degrees of gait impairment? This approach allows a rater and time independent, objective, and mobile assessment of gait in order to standardize staging in PD patients.

## Methods

### Standard Protocol Approvals, Registrations, and Patient Consents

Patients and controls were recruited after obtaining written informed consent. The approval from the ethical committee was received (Re.-No. 4208, 21.04.2010, IRB, Medical Faculty, Friedrich-Alexander-University, Erlangen-Nuremberg, Germany). All clinical investigations have been conducted according to the principles expressed in the Declaration of Helsinki.

### Sample and definition of clinical ratings

PD patients and controls were selected during their visit in the movement disorder outpatient center from April 2010 until February 2012 at the University Hospital Erlangen, Germany. All clinical assessment and correlation to motor signs was based on standardized consensus criteria and performed by a movement disorder specialist. PD patients were included according to the consensus criteria of the German Society of Neurology analogue to the National Institute of Neurological Disorders and Stroke (NINDS) diagnostic criteria for PD [15]. A total of 92 PD patients and 81 controls without gait impairment were enlisted in the present study, divided into two independent age matched populations, and analyzed by eGaIT in a case-control design

(criterion standard) with a training and a validation group. The training population consisted of 50 patients with sporadic PD and 42 age matched controls, the validation population of 42 PD patients and 39 controls (table 1). Predominantly male PD patients were recruited. To exclude motor fluctuations between biometric gait analysis and clinical evaluation the MDS-UPDRS motor score part III [4] rating was obtained immediately ( $<30$  min) prior to eGaIT analysis. The subitems associated with the lower extremity function (UPDRS-III<sub>lower ex</sub>) were defined "bradykinesia; rigidity of neck and lower extremities, tremor of lower extremities; leg agility; posture; gait; arising from chair; postural stability". PD was staged according to H&Y [5]. To control for depression Zung Self-rating Depression Scale (SDS) was obtained [16]. PD patients reached significant higher depression scales than controls in both populations (table 1). From 81 controls, 8 were rated mildly, 2 moderately depressed, from PD patients 26 were mildly, 13 moderately, and 4 severely depressed. Exclusion criteria consisted of non-PD related gait impairments (e.g. spinal or orthopedic surgery), atypical Parkinson syndromes, spasticity, stroke, neuropathy, myelopathy, hydrocephalus, and cognitive impairment. Patients had to be able to walk independently (H&Y $<4$ ). L-Dopa equivalent dosage was calculated from all dopaminergic medication taken [17]. Motion sensor derived raw data a subgroup (27 PD patients and 16 controls) has been recently analyzed in a pilot study using different algorithms and analysis paradigms [18,19].

### Patient subgroups

For subgroup analysis, PD patients were divided into three equally sized subgroups (A) according to H&Y stages (H&Y I, II, or III), and (B) based on their UPDRS-III motor score at "best-on" state ("UPDRS-low": range 0–12; "UPDRS-mild": range 13–22; "UPDRS-high": range 23–50). Axial affection and postural instability defining H&Y substages (1.5 or 2.5) were included (either H&Y I or II) and not categorized separately, because the major goal was to assess and classify features on gait motor function, rather than rating postural instability. Characteristics of subgroups are listed in table S1, S2.

### Standardized gait tasks

Subjects underwent 1) *10-meter walk*: Subjects passed 10 meter distance 4 times at a subjective comfortable walking speed [20]. 2) *Heel-toe tapping*: While sitting, heel and toes were tapped alternately

on the floor for 20 seconds requiring a flexion mainly within the ankle, comparable to the subitem “leg agility” of the UPDRS [4]. 3) *Circling*: While sitting, subjects performed a sequential unilateral circling foot movement 5–10 cm above the ground floor (~30 cm diameter) for 20 seconds to assess the movement without the influence of the body weight.

## eGaIT – Embedded Gait Analysis using Intelligent Technology

The automated gait analysis system “eGaIT” consists of biosensors attached to shoes, data capture, wireless data transfer, feature extraction, and pattern recognition algorithms (figure 1, table 2,3) that performs classification experiments for each group and category (table 4) defined by the clinical rating of motor signs.

### Sensor platform and setup

Inertial sensors (three axes gyroscopes and accelerometers) integrated in the SHIMMER sensor platform (Shimmer Research Ltd., Dublin, Ireland) were used. This sensor system provides an extensible platform for real-time kinematical motion recording. Sensors were attached to the lateral heel of a shoe (figure 1A). Data was captured from both feet using an accelerometer range of  $\pm 6$  g (sensitivity 300 mV/g), a gyroscope range of  $\pm 500$  degree/sec (sensitivity 2 mV/degree/sec), and a sampling rate of 50 Hz. Sensor signals were transmitted via Bluetooth® to a laptop computer and stored for consecutive offline analysis.

### Pattern recognition methods

Pattern recognition methods were used to train eGaIT based classification using the training population (figure 1C). Best classification algorithms were reevaluated using a second independent validation group.

**Feature extraction.** Biometric gait features were extracted from recorded gyroscope and accelerometer signals. They were obtained from single steps and gait sequences [18]. Three different kinds of features were calculated. 1) Step dependent features from single steps of the 10-meter-walk task. One feature is calculated per step and averaged over all steps of one subject, resulting in one value per subject and feature. 2) Sequence dependent features derived from the complete gait sequence in 10-meter-walk and from a 15 second period out of the other tasks. 3) Frequency features were computed from the Fourier transform of gait sequences to incorporate a frequency based analysis. Features were extracted from both shoes, which resulted in 286 features for the 10-meter walk, and in 204 features for both the *heel-toe tapping* and the *circling* task, giving a total of 694 features for each subject (table 2, table S3). Exemplary accelerometer signal and typical feature during 10-meter walk are depicted in figure 1B.

**Feature selection and classification.** The number of total features was reduced to the most relevant using Information Gain feature selection and Sequential Forward Selection. All individual features are ranked based on their information gain values [21]. Sequential Forward Selection algorithm starts with one gait feature and adds one feature after another by using the classification accuracy as an adding criterion [22]. Classifiers define decision boundaries for the separation of subgroups based

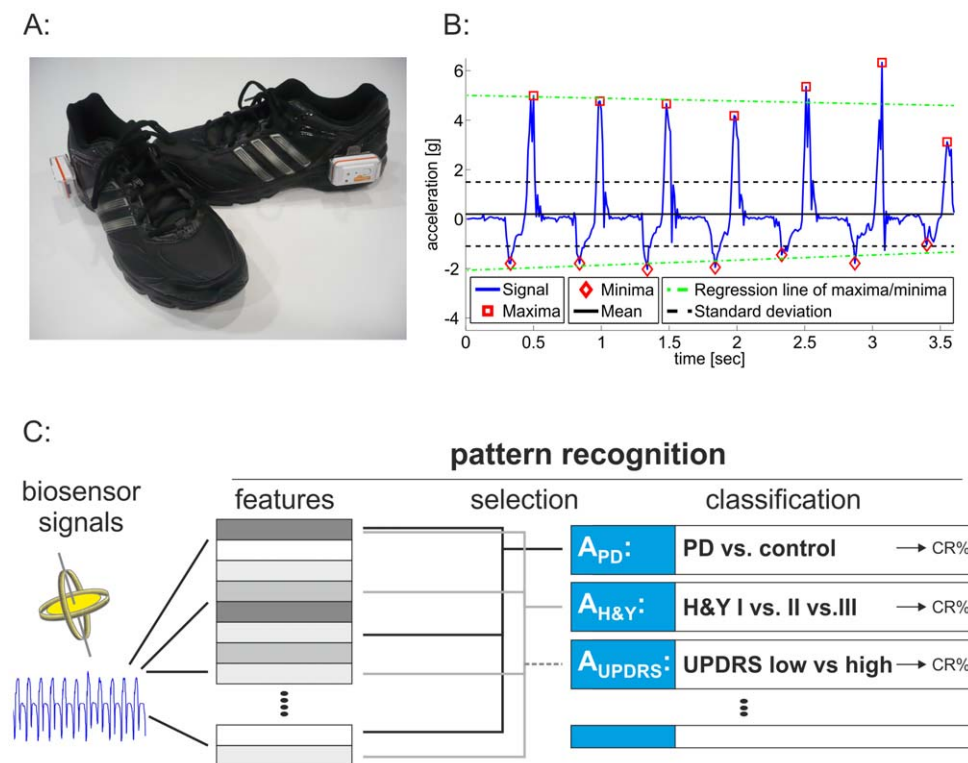

**Figure 1. Embedded gait analysis using intelligent technology (eGaIT) concept.** A: Shoe equipped with biosensors. B: Exemplary raw signal data from accelerometer with some automated computed features. C: Pattern recognition includes feature extraction from biosensor signals followed by selection, and classification of subgroups. Different pattern recognition algorithms were created:  $A_{PD}$  distinguishes between patients and controls, is generated in a training population and validated in an independent validation population.  $A_{H\&Y}$  and  $A_{UPDRS}$  classify PD subgroups and include all samples.

doi:10.1371/journal.pone.0056956.g001

**Table 2.** Feature characteristics.

| Characteristics              | Sensor | Axis         | Task                                                              | Total No. |
|------------------------------|--------|--------------|-------------------------------------------------------------------|-----------|
| Step dependent features      | G      | z-axis       | Steps from 10-meter walk                                          | 10        |
| Step dependent features      | G/A    | x-/y-/z-axis | Steps from 10-meter walk                                          | 72        |
| Sequence dependent features  | G/A    | x-/y-/z-axis | Complete 10-meter walk sequence, 15 sec sequence from other tasks | 288       |
| Frequency dependent features | G/A    | x-/y-/z-axis | Complete 10-meter walk sequence, 15 sec sequence from other tasks | 324       |

Overview of individual features extracted from eGalT based gait analysis. Feature were extracted from both shoes during defined tasks using raw sensor data from gyroscope (G) and/or accelerometer (A) using designated axes (for complete list of feature see table S3).  
doi:10.1371/journal.pone.0056956.t002

on the computed features. As classifiers Linear Discriminant Analysis (LDA), AdaBoost, and Support Vector Machines (SVM) with linear and radial basis function (RBF) kernel [22] were trained and evaluated using a 10-fold cross-validation using the training group [23]. In detail, the complete training dataset was divided into 10 subgroups containing a balanced amount of patients and controls. For stratified cross-validation one subgroup was excluded from the dataset and the classifiers were trained on the remaining subjects. The resulting classification algorithms and

selected features were subsequently cross-validated using the excluded subgroup. Finally, balanced classification rate, specificity, sensitivity, and positive predictive value of optimal feature sets were calculated [23]. This approach was repeated for all subgroups, resulting in an overall classification accuracy for the best classification algorithm identified. At the same time, a minimum subset of features was isolated allowing an accurate distinction between the tested subgroups.

**Table 3.** Single features derived from pattern recognition paradigms.

| Feature |                                                      |                                                                                                                                                                             | Single feature analysis (PD vs. control) |       |
|---------|------------------------------------------------------|-----------------------------------------------------------------------------------------------------------------------------------------------------------------------------|------------------------------------------|-------|
| No      | Name                                                 | Description                                                                                                                                                                 | Sens.                                    | Spec. |
| 10      | Minimum maximum difference                           | Global maximum of one step, averaged over all steps of one subject minus global minimum of one step, averaged over all steps of one subject<br>Task A, Gyroscope z-axis     | 71                                       | 44    |
| 12      | Entropy                                              | Uncertainty measure of the signal<br>Task B, Accelerometer x-axis                                                                                                           | 62                                       | 72    |
| 13      | Regression line of maxima                            | Regression line of all local minima and maxima in the signal sequence<br>Task C, Gyroscope z-axis                                                                           | 67                                       | 56    |
| 16      | Variance                                             | Measure for signal spreading, defined as the square of standard deviation<br>Task A, Gyroscope z-axis                                                                       | 79                                       | 56    |
| 17      | Root mean square                                     | Root Mean Square or quadratic mean is a statistical measure<br>Task A, Gyroscope z-axis                                                                                     | 79                                       | 56    |
|         |                                                      | Task B, Gyroscope z-axis                                                                                                                                                    | 52                                       | 69    |
| 22      | Energy in frequency band 0.5 to 3 Hz                 | Energy in a frequency band describes parts of distinct frequencies in the signal, typical frequency bands for specific movements can be defined<br>Task B, Gyroscope z-axis | 55                                       | 67    |
| 24      | Windowed Energy in frequency band 0.5 to 3 Hz        | Energy in frequency band of 5 second windows with an overlap of 2.5 seconds, windows from complete signal sequence are averaged<br>Task B, Gyroscope z-axis                 | 48                                       | 79    |
| 26      | Power spectral density in frequency band 0.5 to 3 Hz | Energy measurement, Fourier-transform of the signals cross-correlation with itself<br>Task B, Gyroscope z-axis                                                              | 71                                       | 51    |
|         |                                                      | Task B, Accelerometer x-axis                                                                                                                                                | 67                                       | 69    |
| 28      | Regression line of windowed energy                   | Regression line of energy values from window (2.5 s) moved through signal sequence<br>Task C, Gyroscope z-axis                                                              | 71                                       | 56    |

Selected features from derived from pattern recognition algorithm "A<sub>PD</sub>" that show the highest difference ( $p < 0.00001$ ) if tested for differences between PD patients and controls (Student's T-test). Only low sensitivity and specificity is reached by single feature classification (AdaBoost). Description of feature includes the task and the sensor type/axis.

doi:10.1371/journal.pone.0056956.t003

**Table 4.** Classification of PD patients and controls.

| Groups and categories          | n     | Class. rate | Sens.      | Spec.     | PPV       |
|--------------------------------|-------|-------------|------------|-----------|-----------|
| <b>PD vs. CONTROL</b>          |       |             |            |           |           |
| Training sample                | 50:42 | <b>82</b>   | <b>82</b>  | <b>81</b> | <b>84</b> |
| Validation sample              | 42:39 | <b>81</b>   | <b>76</b>  | <b>85</b> | <b>84</b> |
| <b>H&amp;Y STAGING</b>         |       |             |            |           |           |
| H&Y I vs. control              | 14:39 | <b>70</b>   | <b>57</b>  | <b>82</b> | <b>53</b> |
| H&Y II vs. control             | 11:39 | <b>86</b>   | <b>91</b>  | <b>82</b> | <b>59</b> |
| H&Y III vs. control            | 17:39 | <b>91</b>   | <b>100</b> | <b>82</b> | <b>71</b> |
| <b>UPDRS MOTOR SCORE</b>       |       |             |            |           |           |
| UPDRS-low vs. control (0–12)   | 12:39 | <b>74</b>   | <b>67</b>  | <b>82</b> | <b>53</b> |
| UPDRS-mild vs. control (13–22) | 15:39 | <b>81</b>   | <b>80</b>  | <b>82</b> | <b>63</b> |
| UPDRS-high vs. control (23–50) | 15:39 | <b>91</b>   | <b>100</b> | <b>82</b> | <b>68</b> |

The pattern recognition algorithm “A<sub>PD</sub>” identified an optimal classifier and feature combination to reveal balanced classification rates, sensitivity, specificity, and positive predictive value (PPV) for the experiment PD patients vs. controls using the AdaBoost classifier and cross-validation in the training sample. This algorithm was validated using an independent validation sample. Features used for this algorithm include feature no.: 2, 5, 6, 8, 10, 11, 12, 13, 15, 16, 17, 18, 19, 20, 21, 22, 23, 24, 25, 26, 27, 28, 29 derived from the 10-meter walk, heel-toe tapping, and circling test (for detailed description see table S3). doi:10.1371/journal.pone.0056956.t004

## Statistics

Differences in clinical characteristics of patients and controls were calculated based one-way ANOVA, Pearson’s Chi-Square, or Student’s T-test as indicated using the IBM SPSS Statistics software package (IBM Deutschland GmbH, Germany).

## Results

### Single feature analysis: Differences of individual gait features

Biosensor derived raw signals from all tasks were isolated and computed into a total of 694 distinct features (figure 1, table S3). Analyzing all features individually for differences between patients and controls revealed several distinct features that significantly varied between both groups. As an example, the dominant frequency and the root mean square (potentially correlating to the walking speed and changes in alternating movements –table S3) were significantly reduced in PD patients (figure 2A). Nevertheless, a substantial overlap between PD and controls remained even if both features were plotted against each other (figure 2B). This became even clearer when looking in particular at features that were selected by pattern recognition algorithms. Here, comparing selected features individually revealed 11 feature that reached a very high significant difference ( $p < 0.00001$ ; Student’s T-Test) between PD and control (table 3). However, only low sensitivity and specificity was achieved by AdaBoost classification using this single feature approach (table 3).

### Multi-feature analysis: Classification of PD and controls

To overcome the limits of single feature analysis, we used a pattern recognition strategy to identify cluster of features that provide specific information on biosensor based recorded gait impairments (figure 1C, table 4). The first algorithm generated by pattern recognition strategies was used to classify PD patients and controls (algorithm “A<sub>PD</sub>”, figure 1C). This algorithm was cross-

validated using the training population. The AdaBoost classifier revealed the best classification results using a total of 64 different features (table 4, table S3). This resulted in an overall balanced classification rate of 82% for the training population.

In order to exclude overfitting by pattern recognition in a multifeature paradigm, it was important to confirm the resulting algorithm in an independent validation population (table 4). Intriguingly, the algorithm achieved similar classification results (81% correct classification accuracy, 76% sensitivity, 85% specificity, and 84% positive predictive value, table 4) supporting the hypothesis that eGaIT detects PD related gait alterations.

### Characteristics of correct and false negative classification results

Even though a validated 82% correct classification rate for the experiment “PD vs. control” already verified the applicability of eGaIT for gait analysis in PD, we also wanted to identify and characterize the remaining 18% of false classified patients. In a first attempt the classification results were divided by distinct H&Y stages (*H&Y I, II, III*), and different levels of motor impairment as defined by the UPDRS-III motor score (*UPDRS-low, -medium, -high*; table 4). Interestingly, more advanced H&Y stages (*H&Y III*) and more affected patients (*UPDRS-high*, score 23-50/108) reached very good classification results (91%), whereas classification was weaker, both at early stages (70% for *H&Y I*) and for mildly affected patients (74% for *UPDRS-low*). Thus, classification results improved with increased motor impairment or H&Y stages.

In a second attempt, we isolated patients from the validation group that were classified as controls by eGaIT (false negative samples). In order to define possible confounding parameters influencing the gait-based classification by eGaIT we compared the clinical characteristics between correct ( $n = 32$ ) with false negative ( $n = 10$ ) classified PD patients (validation sample, table 4). Notably, among the 10 false negative classified patients, the age was significantly younger than in the group of correctly classified patients ( $58.6 \pm 5.0$ , vs.  $67.1 \pm 10.0$ ,  $p = 0.001$ ). Also, age-at-onset was younger ( $54.4 \pm 6.9$ , vs.  $61.3 \pm 12.0$ ,  $p = 0.031$ ). Vice versa, false positive classified samples ( $n = 6$ ) in the control group were older than correctly classified samples (mean age of false positive results:  $67.8 \pm 10.8$ ; compared to  $59.4 \pm 11.6$ ), without reaching statistical significance ( $p = 0.124$ ). Thus, even though PD and control samples were age-matched, age in particular was the most important confounder for false classification using eGaIT.

The effect of age on false negative classification results was also observed for early H&Y stages (*H&Y I*) and mildly affected patients (*UPDRS-low*, table 5). In particular for the group *H&Y I*, age ( $57.5 \pm 3.7$  vs.  $66.4 \pm 9.9$ ) and age-at-onset ( $54.5 \pm 3.7$  vs.  $64.5 \pm 10.5$ ) was significantly lower in false negative classified patients. A trend, however, was observed for the *UPDRS-low* group without reaching significance (table 5 lower panel). Beneath other factors, in particular weight and gender did not differ between correct and false classified patients, thus, not supporting a confounding influence of these factors on classification quality by eGaIT.

The total UPDRS-III motor score in all false negative classified patients was slightly lower ( $8.5 \pm 3.6$  SD, vs.  $11.7 \pm 2.8$  SD,  $p = 0.06$ ), but not significantly different in the *H&Y I* group only (table 5 upper panel). Motor symptoms in early PD more frequently begin at the upper extremity and leave the lower extremity unaffected [24]. Thus, we tested, if false negative classification of PD patients depends on low or even a lack of impairment of the lower extremity in the both *H&Y I*, or *UPDRS-low* group. However, limiting the UPDRS-III motor score subitems of the lower extremity did not reveal differences between

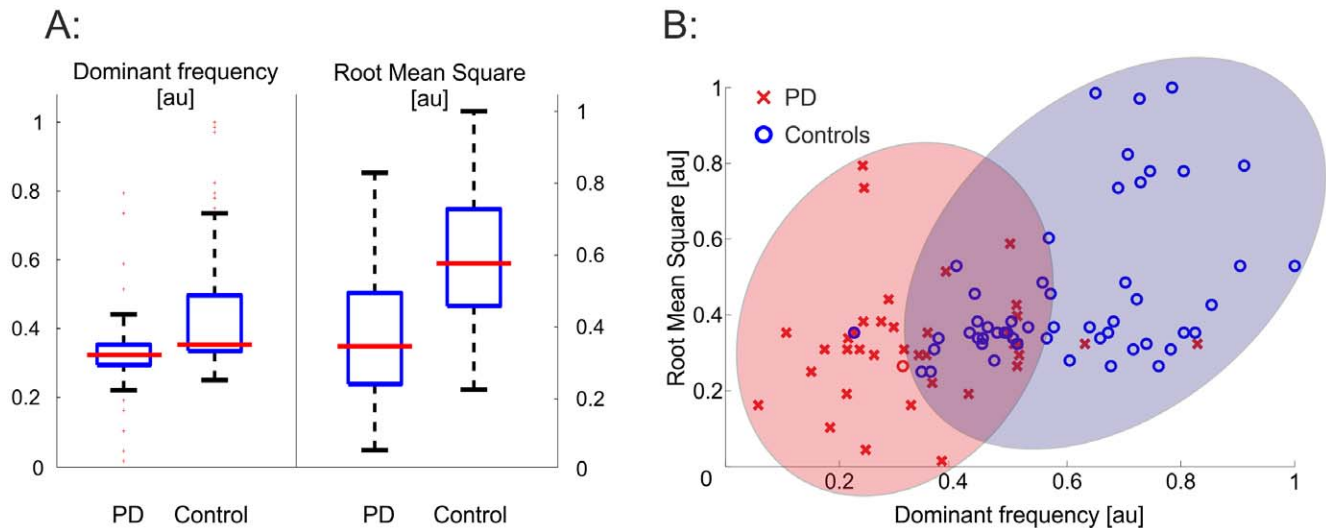

**Figure 2. Single feature changes of gait characteristics in PD.** Individual feature show significant differences between PD and controls (representative examples A, two-feature blots B), but groups overlap substantially (\*:  $p \leq 0.001$ , T-test). doi:10.1371/journal.pone.0056956.g002

**Table 5. Clinical characteristics of correct and false negative classified PD patients.**

| Clinical characteristics                          | correct classified | false negative     | sign. ( $p < 0.05$ ) |
|---------------------------------------------------|--------------------|--------------------|----------------------|
| <b>Hoehn&amp;Yahr (H&amp;Y I)</b>                 | <b>n = 8</b>       | <b>n = 6</b>       |                      |
| Sex (male:female)                                 | 3:5                | 3:3                |                      |
| Phenotype (tremor-dom.:equivalent:akinetic-rigid) | 2:3:3              | 2:1:3              |                      |
| Age (y, mean, $\pm$ SD)                           | 66.4 ( $\pm$ 9.9)  | 57.5 ( $\pm$ 3.7)  | *                    |
| Age at onset (y, mean, $\pm$ SD)                  | 64.5 ( $\pm$ 10.5) | 54.0 ( $\pm$ 3.7)  | *                    |
| Disease duration (y, mean, $\pm$ SD)              | 2.0 ( $\pm$ 1.2)   | 3.9 ( $\pm$ 3.7)   |                      |
| UPDRS motor- score ( $\pm$ SD)                    | 12.0 ( $\pm$ 3.3)  | 8.5 ( $\pm$ 3.6)   |                      |
| Levodopa equivalent [17] (mg/d, $\pm$ SD)         | 130 ( $\pm$ 186)   | 162 ( $\pm$ 233)   |                      |
| Depression score (SDS, $\pm$ SD)                  | 44.8 ( $\pm$ 12.6) | 53.8 ( $\pm$ 12.6) |                      |
| Weight (kg, $\pm$ SD)                             | 77.8 ( $\pm$ 13.8) | 72.7 ( $\pm$ 18.3) |                      |
| Height (cm, $\pm$ SD)                             | 172 ( $\pm$ 11.2)  | 168 ( $\pm$ 8.8)   |                      |
| <b>UDPRS-III motor score (UDPRS-low)</b>          | <b>n = 7</b>       | <b>n = 5</b>       |                      |
| Sex (male:female)                                 | 4:3                | 2:3                |                      |
| Phenotype (tremor-dom.:equivalent:akinetic-rigid) | 2:2:3              | 2:1:2              |                      |
| Age (y, mean, $\pm$ SD)                           | 61.7 ( $\pm$ 11.3) | 58.4 ( $\pm$ 3.4)  |                      |
| Age at onset (y, mean, $\pm$ SD)                  | 57.4 ( $\pm$ 13.8) | 54.8 ( $\pm$ 5.4)  |                      |
| Disease duration (y, mean, $\pm$ SD)              | 4.3 ( $\pm$ 4.1)   | 4.1 ( $\pm$ 4.1)   |                      |
| H&Y ( $\pm$ SD)                                   | 1.6 ( $\pm$ 0.9)   | 1.1 ( $\pm$ 0.2)   |                      |
| Levodopa equivalent [17] (mg/d, $\pm$ SD)         | 283 ( $\pm$ 387)   | 160 ( $\pm$ 261)   |                      |
| Depression score (SDS, $\pm$ SD)                  | 43.8 ( $\pm$ 9.7)  | 53.8 ( $\pm$ 14.1) |                      |
| Weight (kg, $\pm$ SD)                             | 73.6 ( $\pm$ 10.7) | 70.4 ( $\pm$ 19.5) |                      |
| Height (cm, $\pm$ SD)                             | 171 ( $\pm$ 11.5)  | 166 ( $\pm$ 8.3)   |                      |

Clinical characteristics of false negative classified PD patients at early stages (H&Y I) or only mild motor impairment (UPDRS-low;  $< 12$  UPDRS-III motor score) by the algorithm "A<sub>PD</sub>" compared to correctly classified patients revealed age as significantly reduced in the false negative patient groups (Student T-test, \*:  $p < 0.05$ ). doi:10.1371/journal.pone.0056956.t005

false negative and correctly classified PD patients (UPDRS-III<sub>lower ex</sub>: correct classified:  $4.1 \pm 2.0$  SD, vs. false negative:  $3.3 \pm 2.6$  SD,  $p = 0.49$ ), suggesting that classification error was rather not due to the fact that false classified patients have “normal” lower extremity function.

### Classification of Hoehn&Yahr stages or different levels of motor impairment based on the UPDRS motor score

Next, we aimed to use eGaIT to distinguish patient groups at different H&Y stages (*H&Y I, II, III*) or with different levels of motor impairment defined by the UPDRS-III (*UPDRS-low, -medium, -high*). Since subgroups were relatively small, all samples from the training and validation population were included and classification rates were calculated using cross-validation. Thus, the aim was rather to distinguish subgroups of clinically defined patients, than support the diagnosis of PD itself.

For automated classification of Hoehn&Yahr stages a second pattern recognition algorithm was trained (“A<sub>H&Y</sub>”, figure 1c) and verified using cross-validation. Subgroups of patients in different H&Y stages were separated by A<sub>H&Y</sub> from controls with balanced classification rates between 83% and 91% (table 6). A larger difference between H&Y stages (e.g. *H&Y I* vs. *H&Y III*) revealed the best classification results.

The third algorithm (“A<sub>UPDRS</sub>”; figure 1c) was introduced to classify subgroups with different levels of UPDRS-III based motor impairment. Whereas differentiation between *UPDRS-low* vs. *UPDRS-mild*, or *UPDRS-mild* vs. *UPDRS-high* groups reached only 77% correct classification rates, differentiation performance of eGaIT improved substantially for the classification of *UPDRS-low* vs. *UPDRS-high* group with larger UPDRS-III score differences (89% correct classification rate, table 6). Thus, the ability to distinguish between different stages or levels of motor impairment further supports the ability of eGaIT to assess PD related gait alterations.

## Discussion

In the present study, we developed and validated eGaIT as an automated embedded gait analysis system using intelligent technology that combines multiparametric analysis using pattern recognition algorithms with unbiased biosensor derived motion data. eGaIT based classification is able to use gait alterations in PD patients corresponding to the commonly used disease stages and scores for motor symptoms in PD. In particular, eGaIT was able to A) distinguish PD patients from controls, and B) to automatically classify different disease stages and levels of motor impairment of PD patients. Therefore, eGaIT is an objective tool assessing motor symptom related gait alterations in PD, and furthermore allows automated staging and symptom monitoring in PD patients.

The usage of accelerometer based movement detection is increasing in PD. Specific motor symptoms have been characterized in PD patients by the use of biosensors. Multiple accelerometers attached to the trunk, belt, limbs or the spine are used to detect bradykinesia [25], motor-fluctuations [11], trunk stability [26], gait changes to prevent falls [9,10], general activity [7], limb movement [8], and walking speed [27]. However, these approaches compare only single or a limited number of features derived from biosensor signals and focused primarily on specific gait characteristics of individuals or examined a very limited number of subjects. Even though the analysis of single feature correlated to specific gait symptoms [7,8,26,28–30], the values of single feature substantially overlapped between patients from controls. Likewise, we were able to detect individual gait derived features that show significant differences between PD and control (table 2, figure 2), but due to high overlapping values only low sensitivity and specificity could be achieved (table 2). Thus, the applicability of a single feature approach is not feasible for diagnostic workup. Nevertheless, these findings clearly support the use of biosensor systems to assess motor function, but are limited in the diagnostic value in classification of PD stages.

Since single feature approaches do not sufficiently distinguish between patients and controls, we applied pattern recognition

**Table 6.** Classification within patient subgroups.

| Groups and categories             | n     | Classifier            | Task    | Features               | Class. rate | Sens.     | Spec.     | PPV       |
|-----------------------------------|-------|-----------------------|---------|------------------------|-------------|-----------|-----------|-----------|
| <b>H&amp;Y STAGING</b>            |       |                       |         |                        |             |           |           |           |
| <b>H&amp;Y I vs. H&amp;Y II</b>   | 32:24 | SVM linear (C = 15)   | A, C    | 8, 17, 22, 28          | <b>83</b>   | <b>75</b> | <b>91</b> | <b>86</b> |
| <b>H&amp;Y II vs. H&amp;Y III</b> | 24:36 | SVM linear (C = 20)   | A, B    | 12, 14, 18, 26, 27     | <b>83</b>   | <b>83</b> | <b>83</b> | <b>88</b> |
| <b>H&amp;Y I vs. H&amp;Y III</b>  | 32:36 | SVM linear (C = 30)   | A, C    | 5, 16, 23, 24, 25      | <b>91</b>   | <b>92</b> | <b>90</b> | <b>92</b> |
| <b>UPDRS MOTOR SCORE</b>          |       |                       |         |                        |             |           |           |           |
| <b>UPDRS-low vs. UPDRS-mild</b>   | 31:30 | AdaBoost (10 iterat.) | A, B    | 10, 11, 12, 13, 16, 26 | <b>77</b>   | <b>70</b> | <b>84</b> | <b>81</b> |
| <b>UPDRS-mild vs. UPDRS-high</b>  | 30:31 | AdaBoost (10 iterat.) | A, B, C | 8, 12, 17, 22, 24      | <b>77</b>   | <b>77</b> | <b>77</b> | <b>77</b> |
| <b>UPDRS-low vs. UPDRS-high</b>   | 31:31 | SVM linear (C = 30)   | A, C    | 5, 17, 24, 25          | <b>89</b>   | <b>87</b> | <b>90</b> | <b>90</b> |

Subgroups of PD patients defined by either *H&Y I, II, III*, or UPDRS-III based levels of motor impairment (*UPDRS low*: 0–12, *mild*: 13–22; *high*: 23–50) were classified by two additional pattern recognition algorithms (“A<sub>H&Y</sub>”, A<sub>UPDRS</sub>”) and cross-validated from all PD patients. Best classification results were obtained with classifier listed, resulting in the algorithms using selected features from specific tasks (A:10-meter walk, B: heel-toe tapping, C: circling).

doi:10.1371/journal.pone.0056956.t006

algorithms to assess the information on gait alterations concealed within the combination of a high number of biosensor signal derived features. The power of pattern recognition is increasingly appreciated in biomedicine. Modern diagnostic techniques generate a tremendous amount of information that can hardly be analyzed by simple statistical methods. Specifically developed pattern recognition paradigms using a defined set of features derived from unbiased acquired raw data are required to allow the identification of specific combination of features from several hundred features with redundant or no information (figure 1, table S3). In this respect, isolating information containing data patterns is widely used in the definition of biomarker, performing complex population based genetic analysis, and for modern imaging techniques. Pattern recognition requires a clear definition of groups or characteristics for classification. In the present study, the clinical evaluation of the examiner was used as the “gold standard” to train the algorithms. Thus, the primary goal was to recapitulate the rating by a clinician (e.g. diagnostic rating, staging, and motor performance) by eGaIT to develop this system as an objective, unbiased, and automated assessment tool supporting the clinical workup.

Definition of PD with a distinct phenotype and staging is based on the clinical rating of motor symptoms such as bradykinesia, rigidity, tremor, and postural instability. The quantitative definition of these symptoms for the clinical workup is rather broad and relies on the experience of a movement disorder specialist. Quantitative assessments such as striatal dopamine transporter imaging by single photon emission computed tomography is costly, limited available, and not suitable for disease monitoring approaches. Using the present approach, the automated movement analysis system eGaIT consists only of two sensor packages (left and right shoe). It is able to correctly classify patients from controls based on their gait alterations and motor signs with classification rates above 80%. Accuracy of the clinical diagnosis of PD ranges between 50% and 80% [31]. Even though the accuracy of eGaIT based gait analysis is higher, the clinical diagnosis includes differential diagnosis of other neurological disorders with gait impairment. Most importantly, the eGaIT based classification algorithm was confirmed by an independent validation sample (table 4). To our knowledge no other similar studies have been confirmed by an independent validation sample. Here, if multi-feature analysis has been used classification results were mostly verified by cross-validation. This approach is suitable for classification of clearly defined and homogenous populations [13]. Nevertheless, even though we recruited a large patient cohort, the individual gait difference between PD patient subgroups and/or in comparison to control samples might be relatively large. This is of particular importance, because the high number of features may lead to overfitting by the classification algorithm if only one single group of patients and controls was classified. However, since the classification results for the training and validation group did not differ, we conclude that eGaIT is assessing PD related gait changes rather than individual differences of the group participants. This conclusion is further supported by the fact that with increasing levels of motor impairment or advanced stages the classification validity was improving, supporting even more a clear dependency of eGaIT analysis on PD related motor impairment.

The major advantage of the present gait analysis system relies on the objective nature of eGaIT rather than its potential ability to define the diagnosis of PD. This is in particular important for an unbiased and comparable staging of PD. Intriguingly, eGaIT was able to classify individual H&Y stages or distinct levels of motor impairment. Thus, eGaIT is able to complete and confirm the

global assessment by a clinician. It is important to note that the study did not aim to detect axial involvement or postural instability (defined by H&Y substages 1.5, 2.5 or UPDRS-III subitem “postural instability”). The more detailed and better defined rating score for motor signs in PD is the MDS-UPDRS motor score [4]. It is widely used to clinically assess motor symptoms in PD, as well as one of the most important outcome measures in clinical studies for PD [32,33]. The subjective evaluation of UPDRS-based motor symptoms by physicians, or by descriptive reports of patients restricts to a significant extent the comparability of individual assessments and validation of medical interventions. A considerable interrater variability has been reported for the UPDRS [34] and video-based teaching programs aim to improve its interrater comparability [35,36]. In the present study, we aimed to use eGaIT as a rater-independent, objective measure of gait characteristics. We were able to correctly classify three arbitrary groups of PD patients with low, medium, and high levels of motor impairment based on the UPDRS motor score. Classification rates were even higher if UPDRS scores differed more between groups (*UPDRS-low* vs. *UPDRS-high*, table 5). This complements earlier findings, where automated movement detection of the upper limb showed the potential to correlate to a decline in motor function [6]. Previously, similar cluster analysis approaches detected changes in upper limb movement in PD patients by surface electromyography and accelerometers [30]. Furthermore, initial data from our group support the hypothesis, that combinations of upper and lower limb functional analysis might even allow a better quantification of motor impairment in PD [37].

At this point, it is also important to note, that eGaIT derived classification errors showed a strong relation to the age of the individual tested (table 4). In particular, young PD patients were more frequent misclassified as controls, or older controls were falsely classified as PD by eGaIT, respectively. Age is a very important factor for gait changes in the elderly healthy population [38–40]. Even though we age-matched the groups to exclude age as a confounding factor for eGaIT based analysis, the individual results emphasize that gait assessment in movement disorders substantially relies on gait characteristics in age matched control groups. Thus, future studies aiming at individual specificity and sensitivity not only have to include other diseases with gait impairments to allow differential diagnosis including atypical PD syndromes and symptomatic Parkinsonism. In addition, they also have to control for age related gait changes in the elderly healthy population in much greater detail.

In summary, our data supports the potential benefit of eGaIT as an important complementary and objective diagnostic tool for PD. In the future, it might be useful to monitor motor fluctuations in advanced stages of PD, where rapid changes in motor function occur at home during the course of a day. Similar results were obtained from accelerometers attached to limbs and the trunk of PD patients [41], including a web-based application to provide information to a clinical center [42]. Our approach is able to complement other home-based monitoring systems that currently examine distinct motor function in movement disorders of the upper limb [6,11,42–44]. Future studies are necessary including a high number of features and tasks to transfer this approach from standardized gait exercises to global gait patterns in everyday life.

## Supporting Information

**Table S1 Characteristics of the PD subgroups.** Changes between Hoehn&Yahr subgroups (*HYI-III*) were calculated by one-way ANOVA (alpha-level 0.05) (\*:  $p < 0.05$ ; \*\*:  $p < 0.001$ ). Posthoc analysis (Bonferroni) revealed significant differences for



labeled groups ( $p < 0.05$ , #: in between subgroups, § compared to each other subgroup). (DOC)

**Table S2 Characteristics of the PD subgroups.** Changes between distinct groups with different levels of motor impairment as defined by the UPDRS motor score ((*UPDRS low*: 0–12, *mild*: 13–22; *high*: 23–50) were calculated by one-way ANOVA (alpha-level 0.05) (\*:  $p < 0.05$ ; \*\*:  $p \leq 0.001$ ). Posthoc analysis (Bonferroni) revealed significant differences for labeled groups ( $p < 0.05$ , #: in between subgroups, § compared to each other subgroup). (DOC)

## References

- Jankovic J (2008) Parkinson's disease: clinical features and diagnosis. *J Neurosurg Psychiatry* 79: 368–376.
- Rajput AH, Voll A, Rajput ML, Robinson CA, Rajput A (2009) Course in Parkinson disease subtypes: A 39-year clinicopathologic study. *Neurology* 73: 206–212.
- Ellis T, Cavanaugh JT, Earhart GM, Ford MP, Foreman KB, et al. (2011) Which measures of physical function and motor impairment best predict quality of life in Parkinson's disease? *Parkinsonism Relat Disord* 17: 693–697.
- Goetz CG, Fahn S, Martinez-Martin P, Poewe W, Sampaio C, et al. (2007) Movement Disorder Society-sponsored revision of the Unified Parkinson's Disease Rating Scale (MDS-UPDRS): Process, format, and clinimetric testing plan. *Mov Disord* 22: 41–47.
- Goetz CG, Poewe W, Rascol O, Sampaio C, Stebbins GT, et al. (2004) Movement Disorder Society Task Force report on the Hoehn and Yahr staging scale: status and recommendations. *Mov Disord* 19: 1020–1028.
- Goetz CG, Stebbins GT, Wolff D, DeLeeuw W, Bronte-Stewart H, et al. (2009) Testing objective measures of motor impairment in early Parkinson's disease: Feasibility study of an at-home testing device. *Mov Disord* 24: 551–556.
- Dijkstra B, Kamsma YP, Zijlstra W (2010) Detection of gait and postures using a miniaturized triaxial accelerometer-based system: accuracy in patients with mild to moderate Parkinson's disease. *Arch Phys Med Rehabil* 91: 1272–1277.
- Pansera M, Estrada JJ, Pastor L, Cancela J, Greenlaw R, et al. (2009) Multi-parametric system for the continuous assessment and monitoring of motor status in Parkinson's disease: an entropy-based gait comparison. *Conf Proc IEEE Eng Med Biol Soc* 2009: 1242–1245.
- Moore ST, MacDougall HG, Ondo WG (2008) Ambulatory monitoring of freezing of gait in Parkinson's disease. *Journal of Neuroscience Methods* 167: 340–348.
- Bächlin M, Roggen D, Plotnik M, Hausdorff JM, Giladi N, et al. (2009) Online Detection of Freezing of Gait in Parkinson's Disease Patients: A Performance Characterization. *Proceedings of the 4th International Conference on Body Area Networks* 87: 693–698.
- Keijsers NL, Horstink MW, Gielen SC (2006) Ambulatory motor assessment in Parkinson's disease. *Mov Disord* 21: 34–44.
- Eskofier B, Oleson M, DiBenedetto C, Hornegger J (2009) Embedded surface classification in digital sports. *Pattern Recognition Letters* 30: 1448–1456.
- Eskofier BM, Federolf P, Kugler PF, Nigg BM (2011) Marker-based classification of young-elderly gait pattern differences via direct PCA feature extraction and SVMs. *Comput Methods Biomech Biomed Engin*.
- Eskofier BM, Kraus M, Worobets JT, Stefanyshyn DJ, Nigg BM (2012) Pattern classification of kinematic and kinetic running data to distinguish gender, shod/barefoot and injury groups with feature ranking. *Comput Methods Biomech Biomed Engin* 15: 467–474.
- Gelb DJ, Oliver E, Gilman S (1999) Diagnostic criteria for Parkinson disease. *Arch Neurol* 56: 33–39.
- Zung WWK (1994) Self Rating Depression Scale. In: *Scalarum CIP*, editor. *Internationale Skalen für Psychiatric*. Göttingen: Beltz Test GmbH. pp. 101–103.
- Tomlinson CL, Stowe R, Patel S, Rick C, Gray R, et al. (2010) Systematic review of levodopa dose equivalency reporting in Parkinson's disease. *Mov Disord* 25: 2649–2653.
- Barth J, Klucken J, Kugler P, Kammerer T, Steidl R, et al. (2011) Biometric and mobile gait analysis for early diagnosis and therapy monitoring in Parkinson's disease. *Conf Proc IEEE Eng Med Biol Soc* 2011.
- Klucken J, Barth J, Maertens K, Eskofier B, Kugler P, et al. (2011) [Mobile biosensor-based gait analysis: a diagnostic and therapeutic tool in Parkinson's disease]. *Nervenarzt* 82: 1604–1611.
- Steffen T, Seney M (2008) Test-retest reliability and minimal detectable change on balance and ambulation tests, the 36-item short-form health survey, and the unified Parkinson disease rating scale in people with parkinsonism. *Physical Therapy*. pp. 733–746.
- Witten IH, Frank E (2005) *Data Mining: Practical machine learning tools and techniques*: Morgan Kaufmann.
- Theodoridis S, Koutroumbas K (2008) *Pattern Recognition, Fourth Edition*: Academic Press.
- Duda RO, Hart PE, Stork DG (2000) *Pattern Classification (2nd Edition)*: Wiley-Interscience.
- Poewe WH, Wenning GK (1998) The natural history of Parkinson's disease. *Ann Neurol* 44: S1–9.
- Cancela J, Pansera M, Arredondo M, Estrada J, Pastorino M, et al. A comprehensive motor symptom monitoring and management system: The bradykinesia case; 2010. *IEEE*. pp. 1008–1011.
- Maetzler W, Mancini M, Liepelt-Scarfone I, Muller K, Becker C, et al. (2012) Impaired trunk stability in individuals at high risk for Parkinson's disease. *PLoS One* 7: e32240.
- Lord S, Rochester L, Baker K, Nieuwboer A (2008) Concurrent validity of accelerometry to measure gait in Parkinson's Disease. *Gait Posture* 27: 357–359.
- Rochester L, Nieuwboer A, Baker K, Hetherington V, Willems AM, et al. (2008) Walking speed during single and dual tasks in Parkinson's disease: which characteristics are important? *Mov Disord* 23: 2312–2318.
- Mariani B, Hoskovec C, Rochat S, Büla C, Penders J, et al. (2010) 3D gait assessment in young and elderly subjects using foot-worn inertial sensors. *Journal of Biomechanics* 43: 2999–3006.
- Rissanen SM, Kankaanpää M, Meigal A, Tarvainen MP, Nuutinen J, et al. (2008) Surface EMG and acceleration signals in Parkinson's disease: feature extraction and cluster analysis. *Med Biol Eng Comput* 46: 849–858.
- Tolosa E, Wenning G, Poewe W (2006) The diagnosis of Parkinson's disease. *Lancet Neurol* 5: 75–86.
- Goetz CG, Poewe W, Rascol O, Sampaio C (2005) Evidence-based medical review update: pharmacological and surgical treatments of Parkinson's disease: 2001 to 2004. *Mov Disord* 20: 523–539.
- Post B, Merkus MP, de Haan RJ, Speelman JD (2007) Prognostic factors for the progression of Parkinson's disease: a systematic review. *Mov Disord* 22: 1839–1851.
- Richards M, Marder K, Cote L, Mayeux R (1994) Interrater reliability of the Unified Parkinson's Disease Rating Scale motor examination. *Mov Disord* 9: 89–91.
- Goetz CG, Stebbins GT, Chmura TA, Fahn S, Poewe W, et al. (2010) Teaching program for the Movement Disorder Society-sponsored revision of the Unified Parkinson's Disease Rating Scale: (MDS-UPDRS). *Mov Disord* 25: 1190–1194.
- Goetz CG, Stebbins GT (2004) Assuring interrater reliability for the UPDRS motor section: utility of the UPDRS teaching tape. *Mov Disord* 19: 1453–1456.
- Barth J, Sünkel M, Bergner K, Schickhuber G, Winkler J, et al. (2012) Combined analysis of sensor data from hand and gait motor function improves automatic recognition of Parkinson's disease. *Conf Proc IEEE Eng Med Biol Soc* 2012.
- Cabell L, Pienkowski D, Shapiro R, Janura M (2012) Effect of Age and Activity Level on Lower Extremity Gait Dynamics: An Introductory Study. *J Strength Cond Res*.
- Hausdorff JM (2007) Gait dynamics, fractals and falls: finding meaning in the stride-to-stride fluctuations of human walking. *Hum Mov Sci* 26: 555–589.
- Schimpl M, Moore C, Lederer C, Neuhaus A, Sambrook J, et al. (2011) Association between walking speed and age in healthy, free-living individuals using mobile accelerometry—a cross-sectional study. *PLoS One* 6: e23299.
- Patel S, Lorincz K, Hughes R, Huggins N, Growdon J, et al. (2009) Monitoring motor fluctuations in patients with Parkinson's disease using wearable sensors. *IEEE Trans Inf Technol Biomed* 13: 864–873.
- Patel S, Chen BR, Buckley T, Rednic R, McClure D, et al. (2010) Home monitoring of patients with Parkinson's disease via wearable technology and a web-based application. *Conf Proc IEEE Eng Med Biol Soc* 2010: 4411–4414.
- Cunningham L, Mason S, Nugent C, Moore G, Finlay D, et al. (2011) Home-based monitoring and assessment of Parkinson's disease. *IEEE Trans Inf Technol Biomed* 15: 47–53.
- Bechtel N, Scahill RI, Rosas HD, Acharya T, van den Bogaard SJ, et al. (2010) Tapping linked to function and structure in premanifest and symptomatic Huntington disease. *Neurology* 75: 2150–2160.

**Table S3 List of features.** Step features extracted from gyroscope z-axis, signal sequence and frequency features applicable for all axes of accelerometer and gyroscope signals. (DOC)

## Acknowledgments

We thank all participating patients and controls.

## Author Contributions

Conceived and designed the experiments: JK RS JH BE JW. Performed the experiments: JK JB PK JS TH FM ZK JW. Analyzed the data: JK JB BE. Contributed reagents/materials/analysis tools: JK JB PK BE JW. Wrote the paper: JK JB.
